# Supplementary material for: The Role of Illness Perception and Self-Efficacy in Determining Quality of Life among Cancer Patients
Source: MDPI journal article supplement (doi:10.3390/clinpract14020038), 2024-03-19
Supplement: s1 [file s1]

نحن مهتمون بمعرفة بعض المعلومات عنك و عن صحتك. الرجاء الإجابة بنفسك عن كل من الأسئلة التالية و ذلك بوضع دائرة حول الإجابة الأكثر ملائمة لك. لا يوجد جواب "صحيح" أو "خطأ". جميع المعلومات ستعامل بسرية تامة.

تاريخ اليوم (اليوم، الشهر، السنة): 31

| إطلاقاً                                                                       | قليلاً | بما فيه الكفاية | كثيراً جداً |
|-------------------------------------------------------------------------------|--------|-----------------|-------------|
| 1                                                                             | 2      | 3               | 4           |
| هل لديك صعوبة في بذل مجهود جسدي شاق (متعب) مثل حمل كيس مشتريات ثقيل أو حقيبة؟ |        |                 |             |
| 2                                                                             | 2      | 3               | 4           |
| هل لديك صعوبة بالمشي لمسافة <u>طويلة</u> ؟                                    |        |                 |             |
| 3                                                                             | 2      | 3               | 4           |
| هل لديك صعوبة بالمشي لمسافة <u>قصيرة</u> خارج البيت؟                          |        |                 |             |
| 4                                                                             | 2      | 3               | 4           |
| هل تحتاج للبقاء في السرير أو الكرسي خلال اليوم؟                               |        |                 |             |
| 5                                                                             | 2      | 3               | 4           |
| هل تحتاج للمساعدة في الأكل أو ارتداء الملابس أو الاغتسال أو استخدام المراحيض؟ |        |                 |             |
| <b>خلال الأسبوع الماضي:</b>                                                   |        |                 |             |
| إطلاقاً                                                                       | قليلاً | بما فيه الكفاية | كثيراً جداً |
| 6                                                                             | 2      | 3               | 4           |
| هل كنت محدوداً/ مقيداً عند القيام بعملك أو نشاطات يومية أخرى؟                 |        |                 |             |
| 7                                                                             | 2      | 3               | 4           |
| هل كنت محدوداً/ مقيداً في ممارسة هواياتك أو نشاطات في اوقات الفراغ؟           |        |                 |             |
| 8                                                                             | 2      | 3               | 4           |
| هل شعرت بضيق بالنفس؟                                                          |        |                 |             |
| 9                                                                             | 2      | 3               | 4           |
| هل شعرت بأي ألم؟                                                              |        |                 |             |
| 10                                                                            | 2      | 3               | 4           |
| هل كنت بحاجة للراحة؟                                                          |        |                 |             |
| 11                                                                            | 2      | 3               | 4           |
| هل عانيت من مشاكل في النوم (أرق/ صعوبة في النوم/ نوم متقطع)؟                  |        |                 |             |
| 12                                                                            | 2      | 3               | 4           |
| هل شعرت بالضعف؟                                                               |        |                 |             |
| 13                                                                            | 2      | 3               | 4           |
| هل فقدت شهيتك للطعام (القدرة على الاكل)؟                                      |        |                 |             |
| 14                                                                            | 2      | 3               | 4           |
| هل شعرت بالغثيان (الليان)؟                                                    |        |                 |             |
| 15                                                                            | 2      | 3               | 4           |
| هل تقيأت؟                                                                     |        |                 |             |
| 16                                                                            | 2      | 3               | 4           |
| هل عانيت من إمساك؟                                                            |        |                 |             |

انتقل إلى الصفحة التالية من فضلك

## خلال الأسبوع الماضي:

| خلال الأسبوع الماضي: |                                                                               |   |   | إطلاقاً | قليلاً | بما فيه الكفاية | كثيراً جداً |
|----------------------|-------------------------------------------------------------------------------|---|---|---------|--------|-----------------|-------------|
| 17.                  | هل كان لديك إسهال؟                                                            | 1 | 2 | 3       | 4      |                 |             |
| 18.                  | هل كنت متعباً؟                                                                | 1 | 2 | 3       | 4      |                 |             |
| 19.                  | هل عانيت من ألم أثر سلبياً على نشاطاتك اليومية؟                               | 1 | 2 | 3       | 4      |                 |             |
| 20.                  | هل كان لديك صعوبة بالتركيز في بعض الأمور مثل قراءة الجريدة أو مشاهدة التلفاز؟ | 1 | 2 | 3       | 4      |                 |             |
| 21.                  | هل شعرت بالتوتر؟                                                              | 1 | 2 | 3       | 4      |                 |             |
| 22.                  | هل شعرت بالقلق؟                                                               | 1 | 2 | 3       | 4      |                 |             |
| 23.                  | هل شعرت بالإنزعاج؟                                                            | 1 | 2 | 3       | 4      |                 |             |
| 24.                  | هل شعرت باكتئاب ؟                                                             | 1 | 2 | 3       | 4      |                 |             |
| 25.                  | هل كانت لديك صعوبة بتذكر الأشياء؟                                             | 1 | 2 | 3       | 4      |                 |             |
| 26.                  | هل حالتك الجسدية أو علاجك الطبي أثر سلبياً على حياتك <u>العائلية</u> ؟        | 1 | 2 | 3       | 4      |                 |             |
| 27.                  | هل حالتك الجسدية أو علاجك الطبي أثر سلبياً على حياتك <u>الاجتماعية</u> ؟      | 1 | 2 | 3       | 4      |                 |             |
| 28.                  | هل حالتك الجسدية أو علاجك الطبي أديا إلى مشاكل مالية؟                         | 1 | 2 | 3       | 4      |                 |             |

**في الأسئلة التالية الرجاء الإشارة بدائرة حول الأرقام بين 1 - 7 الأكثر ملائمة لك**

29. كيف تُقيّم صحتك عموماً خلال الأسبوع الماضي؟

|       |   |   |   |   |   |           |
|-------|---|---|---|---|---|-----------|
| 7     | 6 | 5 | 4 | 3 | 2 | 1         |
| ممتاز |   |   |   |   |   | سواء جدًا |

30. كيف تُقيّم جودة حياتك عموماً/ مستوى حياتك عموماً خلال الأسبوع الماضي؟

|   |   |   |   |   |   |            |
|---|---|---|---|---|---|------------|
| 7 | 6 | 5 | 4 | 3 | 2 | 1          |
|   |   |   |   |   |   | سےءِ جدًّا |
|   |   |   |   |   |   | ممتاز      |

**Brief Illness Perception Questionnaire-Arabic Language**  
**Version in Lebanon**  
 Lydia Rabbaa Khabbaz

إلى أي حد يؤثر مرضكم على حياتكم؟  
 صفر 1 2 3 4 5 6 7 8 9 10  
 لا يؤثر عليها أبداً يؤثر عليها بشدة

كم تظنون أن مرضكم سيديم؟  
 صفر 1 2 3 4 5 6 7 8 9 10  
 لمدة قليلة جداً صفر

كيف تقيّمون سيطرتكم على المرض؟  
 صفر 1 2 3 4 5 6 7 8 9 10  
 لا سيطرة على الإطلاق سيطرة هائلة

لنم تظنون أن علاجكم يمكن أن يساعدهم؟  
 صفر 1 2 3 4 5 6 7 8 9 10  
 لا يساعدهم على الإطلاق مفيد الى اقصى درجة

الى اي درجة تشعرون بعوارض مرضكم؟  
 صفر 1 2 3 4 5 6 7 8 9 10  
 لا عوارض على الإطلاق عوارض حادة جدا

إلى أي حد يسبب لكم مرضكم القلق؟  
 صفر 1 2 3 4 5 6 7 8 9 10  
 لا قلق على الإطلاق قلق هائل

كيف تقيّمون فهمكم لمرضكم؟  
 صفر 1 2 3 4 5 6 7 8 9 10  
 لا أفهمه على الإطلاق أفهمه بوضوح فائق

كم يؤثر عليكم مرضكم على الصعيد العاطفي؟ (مثلاً يؤثر غضبك، يخيفك، يحزنك أو يسبب لكم الاحباط...)  
 صفر 1 2 3 4 5 6 7 8 9 10  
 لا أتاثر على الإطلاق أتاثر بدرجة هائلة

يرجى منكم أن تذكروا، بترتيب الأهمية، الأسباب الثلاثة التي أدت (برأيكم) إلى مرضكم. الأسباب الأكثر أهمية بالنسبة إلي:

1.

2.

3.



## The Cancer Behavioral Inventory-Brief Arabic in English

Please complete the following:

1- Demographics:

Age: \_\_\_\_\_ Gender: \_\_\_\_\_ Type of Cancer: \_\_\_\_\_

2- Questionnaire about cancer patient behavior:

This questionnaire consists of things a person might do when receiving cancer treatment. We are interested in your level of confidence for performance of these things. Be sure that these ratings precisely reflect your confidence whether you did it before or not. Therefore, the rating will reflect your level of confidence in the performance of these things in the present (or in the near future). Please read each numbered item, then rate your level of confidence in the performance of this behavior. Put a circle around the number in the rating scale. If you circle number “1”, you mean that you are not at all confident in performing this behavior. If you circle number “9”, you mean that you are totally confident in performing this behavior. The numbers in the middle of the scale show that you are somewhat confident in performing this behavior. Please rate all items. If you are not sure about certain items, please provide the best rating you can.

|                                                                                 | Not Confidant at all |   |   | Somewhat Confidant |   |   | Totally Confidant |   |   |
|---------------------------------------------------------------------------------|----------------------|---|---|--------------------|---|---|-------------------|---|---|
| 1- Maintain self-reliance                                                       | 1                    | 2 | 3 | 4                  | 5 | 6 | 7                 | 8 | 9 |
| 2- Maintain positive attitude                                                   | 1                    | 2 | 3 | 4                  | 5 | 6 | 7                 | 8 | 9 |
| 3- Maintain sense of humor                                                      | 1                    | 2 | 3 | 4                  | 5 | 6 | 7                 | 8 | 9 |
| 4- Expressing feelings about the disease                                        | 1                    | 2 | 3 | 4                  | 5 | 6 | 7                 | 8 | 9 |
| 5- Talk about things on my mind at times                                        | 1                    | 2 | 3 | 4                  | 5 | 6 | 7                 | 8 | 9 |
| 6- Maintain activities (work, home, hobbies, social)                            | 1                    | 2 | 3 | 4                  | 5 | 6 | 7                 | 8 | 9 |
| 7- Try to be calm during treatment and avoid frightening ideas                  | 1                    | 2 | 3 | 4                  | 5 | 6 | 7                 | 8 | 9 |
| 8- Participate actively in treatment decisions                                  | 1                    | 2 | 3 | 4                  | 5 | 6 | 7                 | 8 | 9 |
| 9- Ask physician questions                                                      | 1                    | 2 | 3 | 4                  | 5 | 6 | 7                 | 8 | 9 |
| 10- Seek support from others such as family, friends, groups, and organizations | 1                    | 2 | 3 | 4                  | 5 | 6 | 7                 | 8 | 9 |
| 11- Share my fears and concerns with others                                     | 1                    | 2 | 3 | 4                  | 5 | 6 | 7                 | 8 | 9 |
| 12- Control nausea and vomiting (whether you have had it before or not)         | 1                    | 2 | 3 | 4                  | 5 | 6 | 7                 | 8 | 9 |
| 13- Cope with physical difficulties                                             | 1                    | 2 | 3 | 4                  | 5 | 6 | 7                 | 8 | 9 |
| 14- Try to maintain calm during waiting for appointment for one hour or more    | 1                    | 2 | 3 | 4                  | 5 | 6 | 7                 | 8 | 9 |

1- معلومات عامة  
العمر-----

-----الجنس-----

نحن مهتمون بتقييمك لمدى ثقتك في إمكانية إنجازك لهذه الأمور. تأكد من أن التقييمات تعكس بدقة مدى ثقتك سواء قمت أم لم تقم بها في السابق

وبالتالي فإن هذه التقييمات تعكس مدى ثققتك في امكانية انجازك لهذه الامور حاليا (او في المستقبل القريب  
الرجاء قراءة كل عنصر مرقم، ثم قيم هذا العنصر حول مدى ثققتك في امكانية انجاز هذا السلوك. ضع دائره على الرقم الموجود في  
مقياس التقييم اذا وضعت دائره على رقم 1 فانك توضح انك غير واثق تماما من انه يمكنك انجاز هذا التصرف. اذا وضعت دائره  
على رقم 9 فانك توضح انك واثق تماما من انه يمكنك انجاز هذا التصرف. اما الارقام التي في وسط مقياس التقييم فتشير الى انك  
واثق نوعا ما في امكانية قيامك بهذا السلوك الرجاء تقييم كافة العناصر. اذا لم تكن متأكدا بشأن عنصر ما فالرجاء اعطاء افضل  
تقييم ممكن

|     |                                                                                |                |              |            |   |   |   |   |
|-----|--------------------------------------------------------------------------------|----------------|--------------|------------|---|---|---|---|
| 1.  | المحافظة على الاعتماد على النفس                                                | غير واثق تماما | واثق نوعا ما | واثق تماما |   |   |   |   |
| 9   | 8                                                                              | 7              | 6            | 5          | 4 | 3 | 2 | 1 |
| 2.  | المحافظه على الموقف الايجابي                                                   | غير واثق تماما | واثق نوعا ما | واثق تماما |   |   |   |   |
| 9   | 8                                                                              | 7              | 6            | 5          | 4 | 3 | 2 | 1 |
| 3.  | المحافظة على روح الدعابة                                                       | غير واثق تماما | واثق نوعا ما | واثق تماما |   |   |   |   |
| 9   | 8                                                                              | 7              | 6            | 5          | 4 | 3 | 2 | 1 |
| 4.  | التعبير عن المشاعر الخاصة بالمرض                                               | غير واثق تماما | واثق نوعا ما | واثق تماما |   |   |   |   |
| 9   | 8                                                                              | 7              | 6            | 5          | 4 | 3 | 2 | 1 |
| 5.  | التحدث عن ما يدور بفكري أحيانا                                                 | غير واثق تماما | واثق نوعا ما | واثق تماما |   |   |   |   |
| 9   | 8                                                                              | 7              | 6            | 5          | 4 | 3 | 2 | 1 |
| 6.  | المحافظة على الأنشطة (العمل، المنزل، الهوايات، الأمور الاجتماعية)              | غير واثق تماما | واثق نوعا ما | واثق تماما |   |   |   |   |
| 9   | 8                                                                              | 7              | 6            | 5          | 4 | 3 | 2 | 1 |
| 7.  | محاولة الهدوء اثناء العلاج وعدم السماح للأفكار المخيفة ان تقلقني               | غير واثق تماما | واثق نوعا ما | واثق تماما |   |   |   |   |
| 9   | 8                                                                              | 7              | 6            | 5          | 4 | 3 | 2 | 1 |
| 8.  | المشاركة بفاعلية في قرارات العلاج                                              | غير واثق تماما | واثق نوعا ما | واثق تماما |   |   |   |   |
| 9   | 8                                                                              | 7              | 6            | 5          | 4 | 3 | 2 | 1 |
| 9.  | طرح اسئلة على الطبيب                                                           | غير واثق تماما | واثق نوعا ما | واثق تماما |   |   |   |   |
| 9   | 8                                                                              | 7              | 6            | 5          | 4 | 3 | 2 | 1 |
| 10. | السعي لطلب المسانده من العائله، الاصدقاء، المجموعات، والمنظمات                 | غير واثق تماما | واثق نوعا ما | واثق تماما |   |   |   |   |
| 9   | 8                                                                              | 7              | 6            | 5          | 4 | 3 | 2 | 1 |
| 11. | مشاركة مخاوفي وما يقلقني مع الاخرين                                            | غير واثق تماما | واثق نوعا ما | واثق تماما |   |   |   |   |
| 9   | 8                                                                              | 7              | 6            | 5          | 4 | 3 | 2 | 1 |
| 12. | التحكم في القيء والغثيان سواء كنت اعاني من هذه المشاكل من قبل ام لا            | غير واثق تماما | واثق نوعا ما | واثق تماما |   |   |   |   |
| 9   | 8                                                                              | 7              | 6            | 5          | 4 | 3 | 2 | 1 |
| 13. | مواجهة الصعوبات البدنية                                                        | غير واثق تماما | واثق نوعا ما | واثق تماما |   |   |   |   |
| 9   | 8                                                                              | 7              | 6            | 5          | 4 | 3 | 2 | 1 |
| 14. | محاولة الهدوء اثناء الانتظار لمدة ساعة واحدة على الاقل في موعد العلاج الخاص بي | غير واثق تماما | واثق نوعا ما | واثق تماما |   |   |   |   |
| 9   | 8                                                                              | 7              | 6            | 5          | 4 | 3 | 2 | 1 |
